# Supplementary material
Source: PubMed Central journal article supplement (PMC7957961)
Supplement: NIHMS1675627-supplement-Accepted_Suppementary_Material.pdf [file NIHMS1675627-supplement-Accepted_Suppementary_Material.pdf]

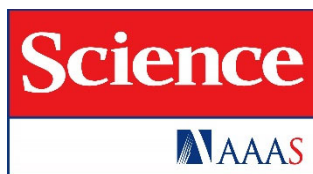

## Supplementary Materials for

### Rotavirus Induces Intercellular Calcium Waves through ADP Signaling

Alexandra L. Chang-Graham<sup>1</sup>, Jacob L. Perry<sup>1</sup>, Melinda A. Engevik<sup>2,3</sup>, Kristen A. Engevik<sup>1</sup>,  
Francesca J. Scribano<sup>1</sup>, J. Thomas Gebert<sup>1</sup>, Heather A. Danhof<sup>1</sup>, Joel C. Nelson<sup>1</sup>, Joseph S.  
Kellen<sup>1</sup>, Alicia C. Strtak<sup>1</sup>, Narayan P. Sastri<sup>1</sup>, Mary K. Estes<sup>1,4</sup>, Robert A. Britton<sup>1</sup>, James  
Versalovic<sup>2,3</sup>, Joseph M. Hyser<sup>1</sup>

correspondence to: [Joseph.Hyser@bcm.edu](mailto:Joseph.Hyser@bcm.edu)

#### **This PDF file includes:**

Figures S1 to S6  
Tables S1 to S3  
Captions for Movies S1 to S11

#### **Other Supplementary Materials for this manuscript includes the following:**

Movies S1 to S11

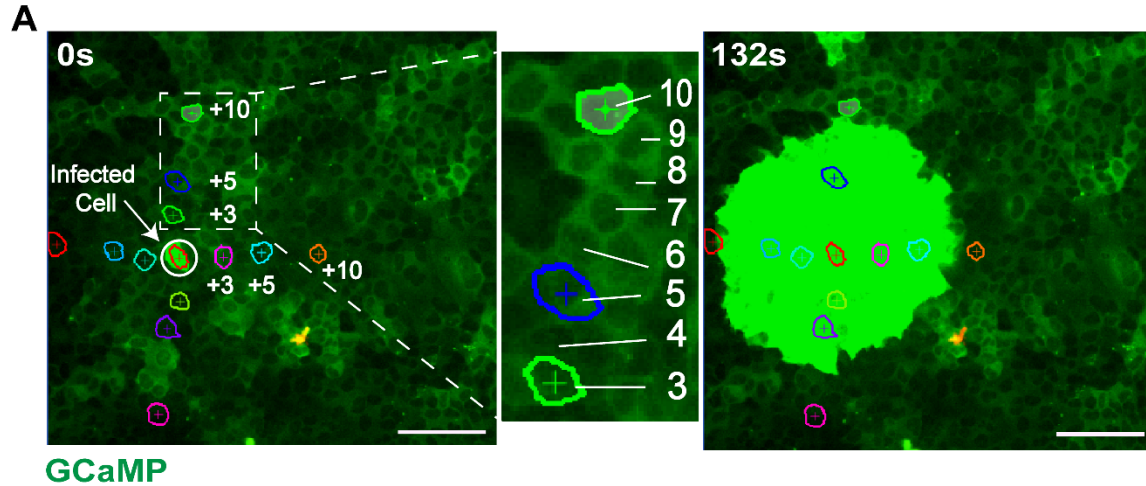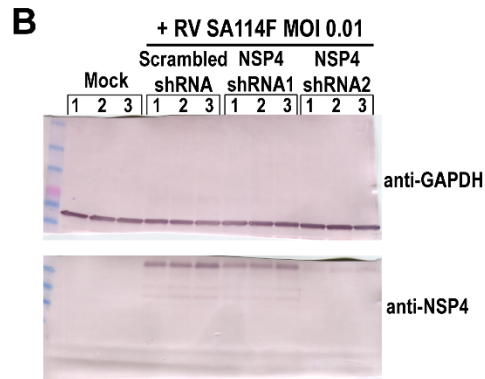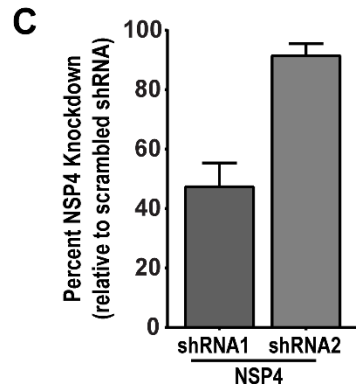

**Figure S1. System for analyzing calcium signals in a rotavirus-infected cell and its neighboring, uninfected cells.**

**(A)** Calcium signal analysis of RV-infected and neighboring, uninfected cells. MA104 cell monolayer infected with RV (SA114F) at MOI 0.01 at ~14 hpi. After identifying the central RV-infected cell, neighboring uninfected cells were designated by the number of cells away from the RV-infected cell (e.g. +3, +5, +10). scale bar = 100  $\mu$ m. **(B)** Western blot for RV NSP4 expression in mock-infected or RV (SA114F)-infected (MOI 0.01) MA104-GCaMP/shRNA cell lines, expressing either scrambled, NSP4 shRNA1, or NSP4 shRNA2. Cells were harvested at 19 hpi. **(C)** Densitometry analysis of western blots for RV NSP4 expression levels, normalized to that of GAPDH expression, expressed as relative to scrambled shRNA cell NSP4 expression. Data shown are 3 infections/condition and representative of  $N=3$  independent experiment. Data represented as mean  $\pm$  SD.

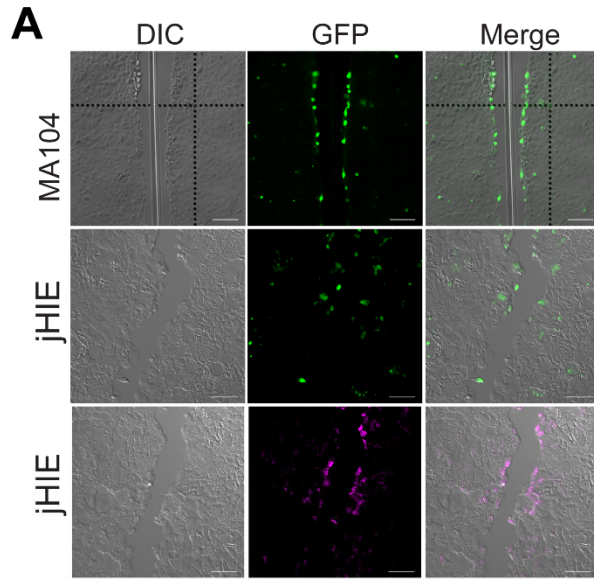

Lucifer Yellow Rhodamine 123

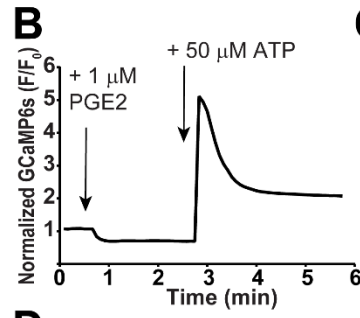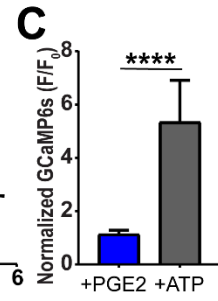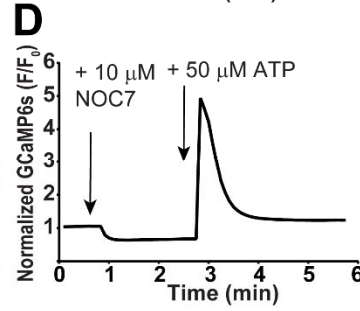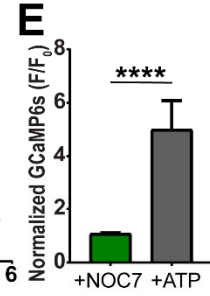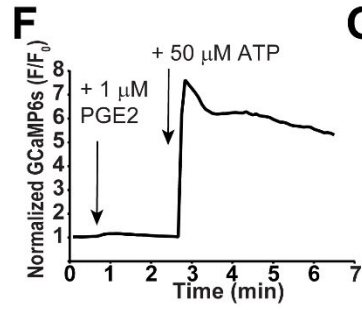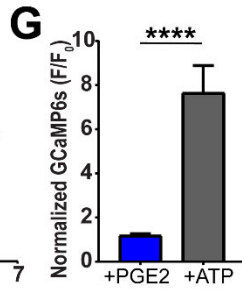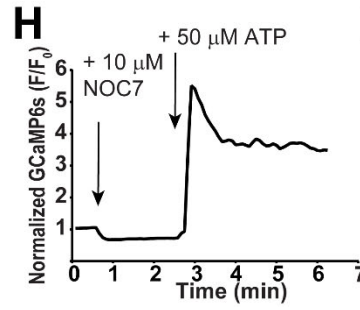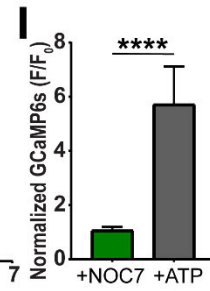

**Figure S2. Rotavirus-induced calcium waves do not occur via gap junctions, prostaglandin E2, or nitric oxide.**

(A) Scrape loading/dye transfer assay with Lucifer Yellow and Rhodamine 123 in MA104 cells and patient J3 jHIE monolayers. Images representative of  $N=3$  independent experiments, scale bar = 100  $\mu\text{m}$ . (B-C) MA104-GCaMP cells treated with 1  $\mu\text{M}$  prostaglandin E2 (PGE2) followed by 50  $\mu\text{M}$  ATP with (B) representative normalized GFP fluorescence average trace and (C) maximum normalized GFP fluorescence increase ( $n = 30$  cells, data representative of  $N=4$  experiments) (D-E) MA104-GCaMP cells treated with 10  $\mu\text{M}$  NOC7 followed by 50  $\mu\text{M}$  ATP with (D) representative normalized GFP fluorescence average trace and (E) maximum normalized GFP fluorescence increase ( $n = 30$  cells, data representative of  $N=4$  experiments). (F-G) Patient J2 jHIE-GCaMP6s cells treated with 1  $\mu\text{M}$  PGE2 followed by 50  $\mu\text{M}$  ATP with (F) representative normalized GFP fluorescence average trace and (G) maximum normalized GFP fluorescence increase ( $n = 30$  cells, data representative of  $N=4$  experiments). (H-I) jHIE-GCaMP6s cells (J2) treated with 10  $\mu\text{M}$  NOC7 followed by 50  $\mu\text{M}$  ATP with (H) representative normalized GFP fluorescence average trace and (I) maximum normalized GFP fluorescence increase ( $n = 30$  cells, data representative of  $N=4$  experiments) (C,E,G,I) Mann-Whitney test used. Data represented as mean  $\pm$  SD, (\*\*\*) $p < 0.0001$ .

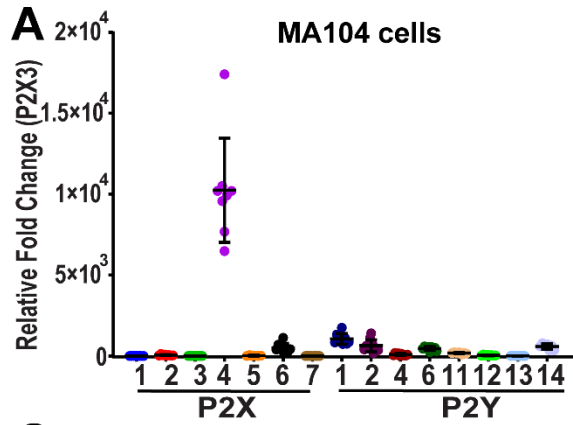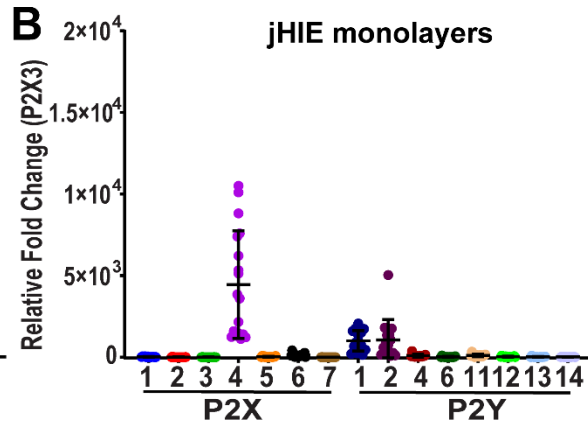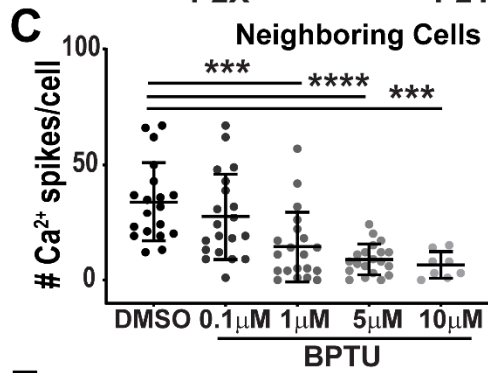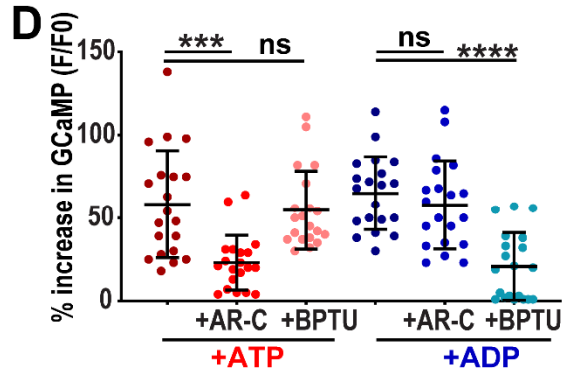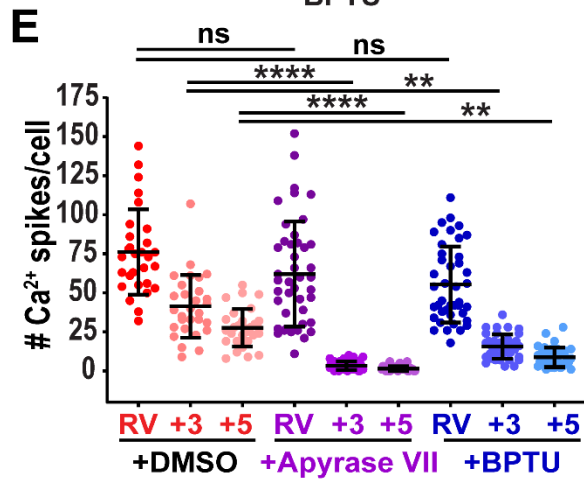

**Figure S3. Purinergic blockers of P2Y1 reduce rotavirus-induced calcium waves.**

**(A-B)** qPCR of purinergic receptor mRNA normalized to 18S mRNA transcripts and fold change relative to P2X3 mRNA levels in MA104 cells infected with **(A)** rotavirus (RV) SA114F-infected MA104 cells or **(B)** RV (Ito)-infected jHIE monolayers, MOI 1, at 24 hpi (data combined from  $N=3$  independent experiments). **(C)** Number of  $\text{Ca}^{2+}$  spikes in neighboring (NB) cells of RV (SA114F)-infected MA104-GCaMP cells treated with DMSO or BPTU. ( $n=20$  cells, data representative of  $N=3$  independent experiments) **(D)** Normalized relative GFP fluorescence of MA104-GCaMP cells incubated with  $10\ \mu\text{M}$  AR-C 118925XX (AR-C) or  $10\ \mu\text{M}$  BPTU for 3.5 min before addition with  $10\ \text{nM}$  ADP or  $1\ \mu\text{M}$  ATP ( $n=20$  cells, data representative of  $N=3$  independent experiments). **(E)**  $\text{Ca}^{2+}$  spikes/cell in RV-infected or NB+3 or NB+5 cell of MA104-GCaMP cells infected with RV (RRV) at MOI 0.05 and treated with DMSO,  $10\ \text{U/mL}$  apyrase VII, or  $10\ \mu\text{M}$  BPTU and imaged  $\sim 6-30$  hpi (data combined from  $N=3$  independent experiments). **(C-E)** Kruskal-Wallis with Dunn's comparisons test. Data represented as mean  $\pm$  SD, (\*\*\*) $p < 0.001$ , (\*\*\*\*) $p < 0.0001$ .

**A****MA104 cells**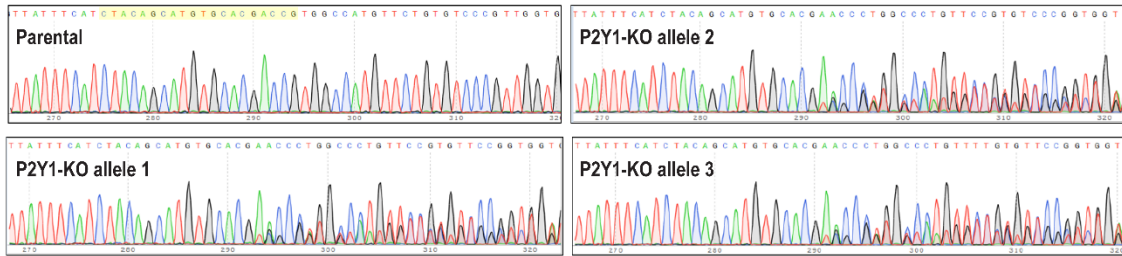**B****P2Y1-KO allele 1**

Y F I Y S M C T T V A M F C V P L V L I L G C Y G L I V R A L I Y  
 Parental IATTTCACTACAGCATGTGCACGACCGTGGCCATGTTCTGTGTCCCGTGGTGTGCTGATTCGGGCTGTATGGATTAACTGIGACAGCTTGTGATTTA  
 P1D5\_a1 IATTTCACTACAGCATGTGCACGACCGTGGCCATGTTCTGTGTCCCGTGGTGTGCTGATTCGGGCTGTATGGATTAACTGIGACAGCTTGTGATTTA  
 P2F2\_a1 IATTTCACTACAGCATGTGCACGACCGTGGCCATGTTCTGTGTCCCGTGGTGTGCTGATTCGGGCTGTATGGATTAACTGIGACAGCTTGTGATTTA  
 P2F3\_a1 IATTTCACTACAGCATGTGCACGACCGTGGCCATGTTCTGTGTCCCGTGGTGTGCTGATTCGGGCTGTATGGATTAACTGIGACAGCTTGTGATTTA  
 Y F I Y S M C T N E F G P V P C P G G A D S G L V W I N W E S F D L

K D I D N S P L R R K S I Y L V I I V L I V F A V S Y I P F H V M K T M.  
 Parental CMAAGACTGGACACCTCCCTCTGAGGAGAAAATCGATATACCTGGTGCATTCGACTGACTGTTTGGCTGTGCTTACATCCCITCCACGTGAGAAAACGATG  
 P1D5\_a1 AAARGACTGGACACCTCCCTCTGAGGAGAAAATCGATATACCTGGTGCATTCGACTGACTGTTTGGCTGTGCTTACATCCCITCCACGTGAGAAAACGATG  
 P2F2\_a1 AAARGACTGGACACCTCCCTCTGAGGAGAAAATCGATATACCTGGTGCATTCGACTGACTGTTTGGCTGTGCTTACATCCCITCCACGTGAGAAAACGATG  
 P2F3\_a1 AAARGACTGGACACCTCCCTCTGAGGAGAAAATCGATATACCTGGTGCATTCGACTGACTGTTTGGCTGTGCTTACATCCCITCCACGTGAGAAAACGATG  
 K R R T G Q L S S E E K N N I P G D H W T D W F C C V L I I P F F W E E K N

**P2Y1-KO allele 2**

Y F I Y S M C T T V A M F C V P L V L I L G C Y G  
 Parental IATTTCACTACAGCATGTGCACGACCGTGGCCATGTTCTGTGTCCCGTGGTGTGCTGATTCGGGCTGTATGGATTAACTGIGACAGCTTGTGATTTA  
 P1D5\_a2 IATTTCACTACAGCATGTGCACGACCGTGGCCATGTTCTGTGTCCCGTGGTGTGCTGATTCGGGCTGTATGGATTAACTGIGACAGCTTGTGATTTA  
 P2F2\_a2 IATTTCACTACAGCATGTGCACGACCGTGGCCATGTTCTGTGTCCCGTGGTGTGCTGATTCGGGCTGTATGGATTAACTGIGACAGCTTGTGATTTA  
 P2F3\_a2 IATTTCACTACAGCATGTGCACGACCGTGGCCATGTTCTGTGTCCCGTGGTGTGCTGATTCGGGCTGTATGGATTAACTGIGACAGCTTGTGATTTA  
 Y F I Y S M C T S E C P V P G P R G G E S G M V \*

**P2Y1-KO allele 3**

Y F I Y S M C T T V A  
 Parental IATTTCACTACAGCATGTGCACGACCGTGGCCATGTTCTGTGTCCCGTGGTGTGCTGATTCGGGCTGTATGGATTAACTGIGACAGCTTGTGATTTA  
 P1D5\_a3 IATTTCACTACAGCATGTGCACGACCGTGGCCATGTTCTGTGTCCCGTGGTGTGCTGATTCGGGCTGTATGGATTAACTGIGACAGCTTGTGATTTA  
 P2F2\_a3 IATTTCACTACAGCATGTGCACGACCGTGGCCATGTTCTGTGTCCCGTGGTGTGCTGATTCGGGCTGTATGGATTAACTGIGACAGCTTGTGATTTA  
 P2F3\_a3 IATTTCACTACAGCATGTGCACGACCGTGGCCATGTTCTGTGTCCCGTGGTGTGCTGATTCGGGCTGTATGGATTAACTGIGACAGCTTGTGATTTA  
 Y F I Y S M C T C R W \*

**C****Jejunum HIEs**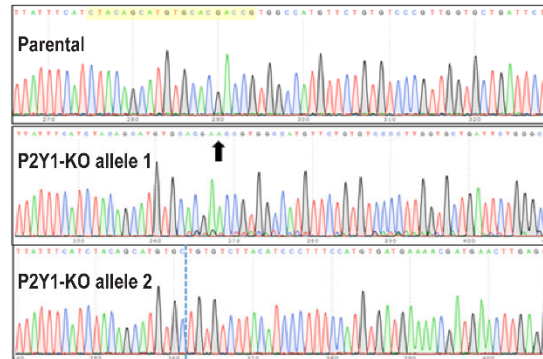**D**

WT\_J2G6s 648 CTACAGCATGTGCACGACCGTGGCCATGTTCTGTGTCCCGTGGTGTGCTGATTCGGGCTGTATGGATTAACTGIGACAGCTTGTGATTTA  
 KO\_P2RY1g1 648 CTACAGCATGTGCACGACCGTGGCCATGTTCTGTGTCCCGTGGTGTGCTGATTCGGGCTGTATGGATTAACTGIGACAGCTTGTGATTTA  
 KO\_P2RY1g1 648 CTACAGCATGTGC-----

WT\_J2G6s TAATTGTGAGAGCTTTGATTTACAAAGATCTGGACAACCTCCTCTGAGGAGAAAATCGATTTACCTGG  
 KO\_P2RY1g1 TAATTGTGAGAGCTTTGATTTACAAAGATCTGGACAACCTCCTCTGAGGAGAAAATCGATTTACCTGG  
 KO\_P2RY1g1 -----

WT\_J2G6s TAATCATGTACTGACTGTTTTTGTGCTGTCTTA  
 KO\_P2RY1g1 TAATCATGTACTGACTGTTTTTGTGCTGTCTTA  
 KO\_P2RY1g1 -----TGTGTCTTA



**Figure S4. Genotyping of P2Y1 knockout MA104 cells and jejunum human intestinal enteroids.**

(A) Sequencing chromatogram and (B) genotyping of P2Y1 receptor knockout in MA104-GCaMP-P2Y1ko cells. Parental P2Y1 receptor sequence compared to 3 alleles, mutations in red. (C) Sequence chromatogram and (D) genotyping of P2Y1 receptor knockout in jejunum HIE-GCaMP6s-P2Y1ko cells. Parental P2Y1 receptor sequence compared to 2 alleles of the P2Y1 receptor knockouts with an insertion (black arrow) and deletion (dashed line) indicated. The sequence shown is 648 nucleotides relative to the P2Y1 receptor start codon. Small guide RNA sequences highlighted in yellow.

**A****Jejunum HIEs**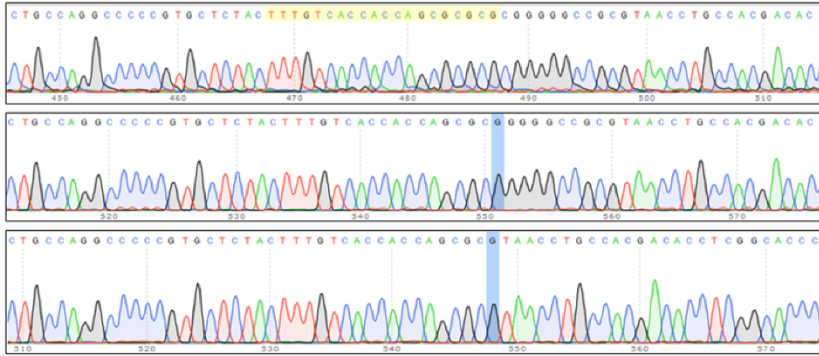

Parental

P2Y2-KO allele 1

P2Y2-KO allele 2

**B**

WT\_J2G6s 502GTGCTCTACTTTGTCACCACCAGCGCGCGGGGGCCGCGTAACCTGCCACGACAC  
 KO\_P2RY2g1 502GTGCTCTACTTTGTCACCACCAGCGCG-----GGGGCCGCGTAACCTGCCACGACAC  
 KO\_P2RY2g1 502GTGCTCTACTTTGTCACCACCAGCG-----TAACCTGCCACGACAC

**Figure S5. Genotyping of P2Y2 knockout jejunum human intestinal enteroids.**

(A) Sequence chromatogram and (B) genotyping of P2Y2 receptor knockout in jejunum HIE-GCaMP6s-P2Y2ko cells. Parental P2Y2 receptor sequence is compared to 2 alleles from the P2Y2 receptor knockouts with the sites of mutation highlighted in blue. Small guide RNA sequence highlighted in yellow. The sequence shown is 502 nucleotides relative to the P2Y2 receptor start codon.

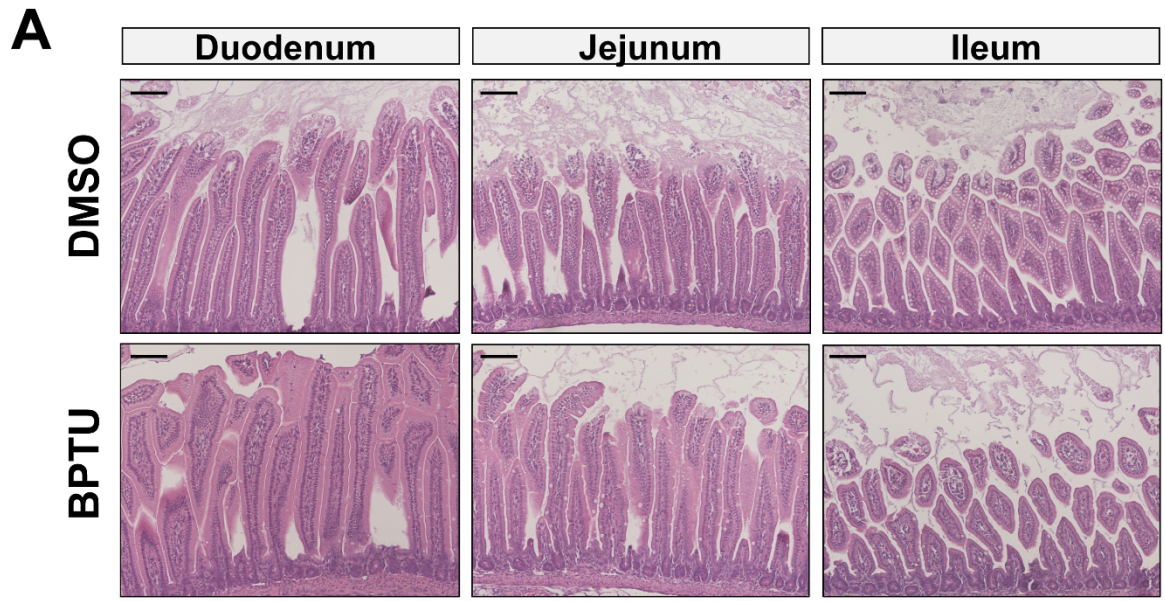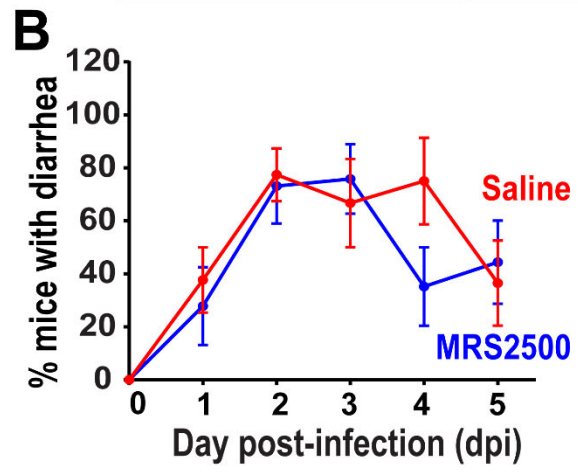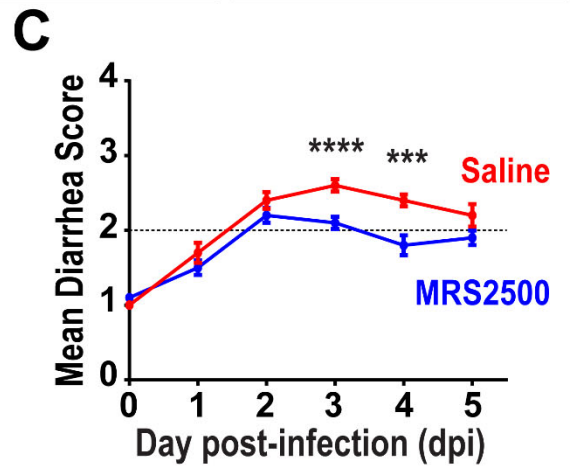

**Figure S6. P2Y1 receptor blockers attenuate rotavirus diarrhea in neonatal mice.**

**(A)** Hematoxylin and eosin-stained intestinal sections from RV-infected mouse pups treated with DMSO or BPTU, 5 dpi. Scale bar = 100  $\mu$ m. **(B)** Percentage of C57Bl/6J mouse pups with diarrhea infected with Rhesus RV and vehicle- (8 cages, n = 46 pups) or MRS2500-treated (4 mg/kg) (9 cages, n = 60 pups) and the **(C)** mean diarrhea score. Mann-Whitney test, data presented as mean  $\pm$  SEM (\*p<0.05, \*\*p<0.01).

**Table S1: Purinergic receptor expression comparison of mock- and rotavirus-infected cells**

| Receptor     | MA104 cells      |                  |            | Jejunum Human Intestinal Enteroids |                 |            |
|--------------|------------------|------------------|------------|------------------------------------|-----------------|------------|
|              | Mock             | RV-Infected      | Statistics | Mock                               | RV-Infected     | Statistics |
|              | Average ± Stdev  | Average ± Stdev  | p value    | Average ± Stdev                    | Average ± Stdev | p value    |
| <b>P2X1</b>  | 2.2 ± 2.8        | 4.6 ± 3.3        | >0.9999    | 15.4 ± 10.4                        | 18.6 ± 17.9     | >0.9999    |
| <b>P2X2</b>  | 45.5 ± 326.9     | 58.1 ± 35.1      | >0.9999    | 4.4 ± 6.7                          | 4.7 ± 7.9       | >0.9999    |
| <b>P2X3</b>  | 1.9 ± 2.1        | 1.5 ± 2.1        | >0.9999    | 2.4 ± 2.1                          | 2.4 ± 3.4       | >0.9999    |
| <b>P2X4</b>  | 12412.8 ± 1837.2 | 10818.4 ± 3229.8 | >0.9999    | 8196.5 ± 876.3                     | 4601.3 ± 3231.1 | >0.9999    |
| <b>P2X5</b>  | 6.6 ± 9.12       | 21.9 ± 17.0      | >0.9999    | 35.9 ± 19.3                        | 31.4 ± 25.6     | >0.9999    |
| <b>P2X6</b>  | 943.8 ± 377.3    | 551.5 ± 258.0    | 0.0709     | 357.3 ± 184.9                      | 152.1 ± 129.4   | 0.9991     |
| <b>P2X7</b>  | 0.4 ± 0.5        | 0.5 ± 0.9        | >0.9999    | 3.6 ± 4.9                          | 1.6 ± 2.3       | >0.9999    |
| <b>P2Y1</b>  | 1637.0 ± 585.7   | 1144.6 ± 321.5   | 0.06       | 2363.0 ± 1621.5                    | 1117.2 ± 685.1  | >0.9999    |
| <b>P2Y2</b>  | 587.5 ± 278.5    | 638.9 ± 368.6    | >0.9999    | 1791.4 ± 965.6                     | 1348.3 ± 1309.5 | 0.4078     |
| <b>P2Y4</b>  | 26.4 ± 21.7      | 93.7 ± 58.9      | >0.9999    | 110.2 ± 73.7                       | 97.5 ± 76.9     | >0.9999    |
| <b>P2Y6</b>  | 570.1 ± 99.7     | 465.8 ± 117.3    | 1.0        | 19.1 ± 11.5                        | 19.7 ± 22.4     | >0.9999    |
| <b>P2Y11</b> | 213.2 ± 119.9    | 183.7 ± 45.6     | 1.0        | 322.8 ± 197.9                      | 165.9 ± 150.5   | 0.9944     |
| <b>P2Y12</b> | 32.1 ± 21.3      | 43.3 ± 27.6      | >0.9999    | 41.9 ± 35.1                        | 35.3 ± 27.3     | >0.9999    |
| <b>P2Y13</b> | 6.4 ± 7.6        | 13.2 ± 12.3      | >0.9999    | 16.4 ± 18.3                        | 16.4 ± 20.3     | >0.9999    |
| <b>P2Y14</b> | 308.0 ± 336.6    | 584.8 ± 171.8    | >0.9999    | 28.9 ± 19.9                        | 16.2 ± 12.0     | >0.9999    |

**Table S2: Genotyping primers for P2Y1 and P2Y2 receptors**

| <b>Gene Target</b> | <b>Species</b> | <b>Product size</b> | <b>Forward (5') Sequence</b> | <b>Reverse (3') Sequence</b> |
|--------------------|----------------|---------------------|------------------------------|------------------------------|
| <i>P2RY1</i>       | Human          | 954 bp              | CAGACTGGATCTTCGGG<br>GATGCC  | CCCGCCAAGAAATAGAGAATGG<br>GG |
| <i>P2RY2</i>       | Human          | 1025 bp             | CCTGGAATGACACCATC<br>AATGGC  | CCTCTGCATGTCAGTTCTGTCG       |

**Table S3: qPCR primer sequences**

| <b>Gene</b>                    | <b>Species</b> | <b>Forward (5') Sequence</b> | <b>Reverse (3') Sequence</b> |
|--------------------------------|----------------|------------------------------|------------------------------|
| <i>18S</i>                     | Universal      | CGCCTTCCTCTTCGAGTATGA        | AGATAACGCCACCTTCTTATTACG     |
| <i>IL-1<math>\alpha</math></i> | Human          | GAATGACGCCCTCAATCAAAGT       | TCATCTTGGGCAGTCACATACA       |
| <i>COX2</i>                    | Human          | ATCATTCACCAGGCAAATTGC        | GGCTTCAGCATAAAGCGTTTG        |
| <i>iNOS</i>                    | Human          | CAGCTCCACAAGCTGGCTCG         | CAGGATGTCCTGAACGTAGACCTTG    |
| <i>P2X1</i>                    | Human          | CGCCTTCCTCTTCGAGTATGA        | AGATAACGCCACCTTCTTATTACG     |
| <i>P2X2</i>                    | Human          | GCCTACGGGATCCGCATT           | TGGTGGGAATCAGGCTGAAC         |
| <i>P2X3</i>                    | Human          | GCTGGACCATCGGGATCA           | GAAAACCCACCCTACAAAGTAGGA     |
| <i>P2X4</i>                    | Human          | CCTCTGCTTGCCAGGTA            | CCAGGAGATACGTTGTGCTCAA       |
| <i>P2X5</i>                    | Human          | CTGCCTGTCGCTGTTCTGA          | GCAGGCCACCTTCTTGTT           |
| <i>P2X6</i>                    | Human          | AGGCCAGTGTGTGGTGTCA          | TCTCCACTGGGCACCAACTC         |
| <i>P2X7</i>                    | Human          | TCTTCGTGATGACAACTTTCTCAA     | GTCTGCGGGTGGGATACT           |
| <i>P2Y1</i>                    | Human          | CGTGCTGGTGTGGCTCATT          | GGACCCCGGTACCTGAGTAGA        |
| <i>P2Y2</i>                    | Human          | GAACTGACATGCAGAGGATAGAAGAT   | GCCGGCGTGGACTCTGT            |
| <i>P2Y4</i>                    | Human          | CCGTCCTGTGCCATGACA           | TGACCGCCGAGCTGAAGT           |
| <i>P2Y6</i>                    | Human          | GCCGGCGACCACATGA             | GACCCTGCCTCTGCCATTT          |
| <i>P2Y11</i>                   | Human          | CTGGAGCGCTTCTCTTCAC          | GGTAGCGGTTGAGGCTGATG         |
| <i>P2Y12</i>                   | Human          | AGGTCCTCTTCCCACTGCTCTA       | CATCGCCAGGCCATTTGT           |
| <i>P2Y13</i>                   | Human          | GAGACTCGGATAGTACAGCTGGTA     | GCAGGATGCCGGTCAAGA           |
| <i>P2Y14</i>                   | Human          | TTCCTTTCAAGATCCTTGGTGACT     | GCAGAGACCCTGCACACAAA         |



**Movie S1. Rotavirus infection induces calcium signaling beyond the infected cell.**

MA104-GCaMP cells were mock- or rotavirus (strain SA114F)-infected and live time-lapse imaging was performed. GCaMP reports cytoplasmic  $\text{Ca}^{2+}$  as changes in fluorescence intensity (green) and images of RV-antigen positive cells by immunofluorescence (pink) were superimposed on the movies. Note the imbedded timer displays time from the beginning of acquisition not the time post-infection.

**Movie S2. Rotavirus-infected cells elicit intercellular calcium waves.**

MA104-GCaMP5G cells were mock-inoculated or rotavirus-infected with the recombinant SA11c13-mRuby3 reporter virus and live time-lapse imaging was performed. GCaMP5G reports cytoplasmic  $\text{Ca}^{2+}$  as changes in fluorescence intensity (green) and rotavirus protein synthesis is reported by mRuby3 expression (pink) from the nonstructural protein 3 (NSP3) open-reading frame. Note the imbedded timer displays time from the beginning of acquisition not the time post-infection.

**Movie S3. shRNA knockdown of NSP4 reduces intercellular calcium waves in rotavirus infection.**

MA104-GCaMP cells expressing either a scrambled shRNA (left) or NSP4-specific shRNA (right) were rotavirus-infected with the recombinant SA11c13-mRuby3 reporter virus and live time-lapse imaging was performed. GCaMP reports cytoplasmic  $\text{Ca}^{2+}$  changes in fluorescence intensity (green) and rotavirus protein synthesis is reported by mRuby3 expression (pink) from the NSP3 open-reading frame. Note the imbedded timer displays time from the beginning of acquisition not the time post-infection.

**Movie S4. Blocking enterotoxin NSP4 signaling does not reduce intercellular calcium waves in rotavirus infection.**

MA104-GCaMP cells were mock-inoculated or rotavirus-infected with the recombinant SA11c13-mRuby3 reporter virus and live time-lapse imaging was performed. GCaMP5G reports cytoplasmic  $\text{Ca}^{2+}$  as changes in fluorescence intensity (green) and rotavirus protein synthesis is reported by mRuby3 expression (pink) from the nonstructural protein 3 (NSP3) open-reading frame. Cells were treated with anti-VP7 M60 MAb, anti-NSP4 MAb 622, or anti-NSP4 antisera 120-147 (Rb Ab) after infection. Note the imbedded timer displays time from the beginning of acquisition not the time post-infection.

**Movie S5. Blocking purinergic signaling inhibits intercellular calcium waves in rotavirus infection.**

MA104-GCaMP cells were mock-inoculated or rotavirus-infected with the recombinant SA11c13-mRuby3 reporter virus and live time-lapse imaging was performed. GCaMP5G reports cytoplasmic  $\text{Ca}^{2+}$  as changes in fluorescence intensity (green) and rotavirus protein synthesis is reported by mRuby3 expression (pink) from the nonstructural protein 3 (NSP3) open-reading frame. Cells were treated with 10 U/mL apyrase after infection. Note the imbedded timer displays time from the beginning of acquisition not the time post-infection.

**Movie S6. Blocking the P2Y1 receptor inhibits intercellular calcium waves in rotavirus infection.**

MA104-GCaMP cells were mock-inoculated or rotavirus-infected with the recombinant SA11c13-mRuby3 reporter virus and live time-lapse imaging was performed. GCaMP5G reports cytoplasmic  $\text{Ca}^{2+}$  as changes in fluorescence intensity (green) and rotavirus protein synthesis is reported by mRuby3 expression (pink) from the nonstructural protein 3 (NSP3) open-reading frame. Cells were treated with 10  $\mu\text{M}$  BPTU after infection. Note the imbedded timer displays time from the beginning of acquisition not the time post-infection.

**Movie S7. Rotavirus infection induces intercellular calcium waves in human intestinal enteroids.**

Jejunum HIE-GCaMP6s enteroid monolayers were mock- or rotavirus (strain Ito)-infected, and imaged once per minute for ~7-22 hpi. GCaMP6s reports cytoplasmic  $\text{Ca}^{2+}$  as changes in fluorescence intensity (green). Note the imbedded timer displays time from the beginning of acquisition not the time post-infection.

**Movie S8. Blocking purinergic signaling and P2Y1 receptor inhibits intercellular calcium waves in human intestinal enteroids.**

Jejunum HIE-GCaMP6s enteroid monolayers were mock- or rotavirus (strain Ito)-infected, and treated with vehicle (DMSO), 100 U/mL apyrase, or 10  $\mu\text{M}$  BPTU and imaged once per minute for ~7-22 hpi. GCaMP6s reports cytoplasmic  $\text{Ca}^{2+}$  as changes in fluorescence intensity (green). Note the imbedded timer displays time from the beginning of acquisition not the time post-infection.

**Movie S9. CRISPR/Cas9 knockout of the P2Y1 receptor reduces intercellular calcium waves.**

MA104-GCaMP6s or MA104-GCaMP6s-P2Y1ko cells were mock-inoculated or rotavirus-infected with the recombinant SA11c13-mRuby3 reporter virus and live time-lapse imaging was performed. GCaMP reports cytoplasmic  $\text{Ca}^{2+}$  as changes in fluorescence intensity (green) and rotavirus protein synthesis is reported by mRuby3 expression (pink) from the nonstructural protein 3 (NSP3) open-reading frame. Note the imbedded timer displays time from the beginning of acquisition not the time post-infection.

**Movie S10. CRISPR/Cas9 knockout of the P2Y1 receptor inhibits intercellular calcium waves in human intestinal enteroids.**

Jejunum HIE-GCaMP6s, jHIE-GCaMP6s-P2Y1ko, and jHIE-GCaMP6s-P2Y2ko monolayers were mock- or rotavirus (strain Ito)-infected, imaged once per minute for ~7-22 hpi. GCaMP6s reports cytoplasmic  $\text{Ca}^{2+}$  as changes in fluorescence intensity (green). Note the imbedded timer displays time from the beginning of acquisition not the time post-infection.

**Movie S11. Blocking the P2Y1 receptor decreases RV-induced human intestinal enteroid swelling.**

3D jejunum HIE-GCaMP6s enteroids were mock- or rotavirus (strain Ito)-infected, treated with vehicle (DMSO) or 10  $\mu$ M BPTU, and imaged once per 2-3 min in GFP and differential interference contrast on a widefield epifluorescence microscope for ~3-21 hpi. GCaMP6s reports cytoplasmic Ca<sup>2+</sup> as changes in fluorescence intensity (green). Note the imbedded timer displays time from the beginning of acquisition not the time post-infection.
